# Supplementary material
Source: PubMed Central journal article supplement (PMC8028608)
Supplement: mmc1.pdf [file mmc1.pdf]

**Supplementary tables:**

**Table S1. Algorithms or rules for the rational design of miRNA and siRNA molecules.**

|                                                                                                                                                                                                                                                                                                                                                                                                                                                                                                                                                                                    |                                                                                                                                                                                                                                                    |                                                                                                                                                                                                                                                                                                                                                                                                                                                                                                                                                                                                                                                                                                                    |
|------------------------------------------------------------------------------------------------------------------------------------------------------------------------------------------------------------------------------------------------------------------------------------------------------------------------------------------------------------------------------------------------------------------------------------------------------------------------------------------------------------------------------------------------------------------------------------|----------------------------------------------------------------------------------------------------------------------------------------------------------------------------------------------------------------------------------------------------|--------------------------------------------------------------------------------------------------------------------------------------------------------------------------------------------------------------------------------------------------------------------------------------------------------------------------------------------------------------------------------------------------------------------------------------------------------------------------------------------------------------------------------------------------------------------------------------------------------------------------------------------------------------------------------------------------------------------|
| <p><b>E-value</b></p> $E = Kmn e^{-\lambda S}$ <p>K, <math>\lambda</math> = high-scoring segment pairs parameters<br/> m, n = limit of sufficiently large sequence lengths</p>                                                                                                                                                                                                                                                                                                                                                                                                     |                                                                                                                                                                                                                                                    |                                                                                                                                                                                                                                                                                                                                                                                                                                                                                                                                                                                                                                                                                                                    |
| <b>Ui-Tei rules</b>                                                                                                                                                                                                                                                                                                                                                                                                                                                                                                                                                                | <b>Amarzguioui rules</b>                                                                                                                                                                                                                           | <b>Reynolds rules</b>                                                                                                                                                                                                                                                                                                                                                                                                                                                                                                                                                                                                                                                                                              |
| <ul style="list-style-type: none"> <li>- A/U at the 5' terminus of the sense strand</li> <li>- G/C at the 5' terminus of the antisense strand</li> <li>- At least 4 A/U residues in the 5' terminal 7 bp of sense strand</li> <li>- No GC stretch longer than 9 nucleotides</li> </ul>                                                                                                                                                                                                                                                                                             | <ul style="list-style-type: none"> <li>- Duplex End A/U differential &gt;0</li> <li>- Strong binding of 5' sense strand</li> <li>- No U at position 1</li> <li>- Presence of A at position 6</li> <li>- Weak binding of 3' sense strand</li> </ul> | <ul style="list-style-type: none"> <li>- GC content 30–52% (one point)</li> <li>- Occurrence of three or more A/U base pair at position 15–19 of the sense strand (Each A/U base pair in this region earns one point)</li> <li>- Low internal stability at the target site (<math>T_m &gt; -20^\circ\text{C}</math>) (one point)</li> <li>- Presence of A at position 19 of the sense strand (one point)</li> <li>- Presence of A at position three of the sense strand (one point)</li> <li>- Presence of U at position ten of the sense strand (one point)</li> <li>- Absence of G at position 13 of the sense strand (one point)</li> <li>- Threshold for efficient siRNAs score <math>\geq 6</math></li> </ul> |
| <p><b>T<sub>m</sub> calculation formula</b></p> $T_m = \{(1000 \times \Delta H) / (A + \Delta S + R \ln (CT/4)) - 273.15 + 16.6 \log [Na^+]\}$ <p>Here,</p> <p><math>\Delta H</math> = the sum of the nearest neighbor enthalpy change (kcal/ mol).</p> <p>A = the helix initiation constant (-10.8).</p> <p><math>\Delta S</math> = the sum of the nearest neighbor entropy change.</p> <p>R = the gas constant (1.987 cal/deg/mol).</p> <p>CT = the total molecular concentration of the strand (100 <math>\mu\text{M}</math>).</p> <p>[Na<sup>+</sup>] was fixed at 100 mM.</p> |                                                                                                                                                                                                                                                    |                                                                                                                                                                                                                                                                                                                                                                                                                                                                                                                                                                                                                                                                                                                    |
| <p><b>Free energy of the heterodimer of sequence A and sequence B</b></p> $\Delta G_{\text{binding}} = \Delta G_{AB} - \Delta G_A - \Delta G_B$                                                                                                                                                                                                                                                                                                                                                                                                                                    |                                                                                                                                                                                                                                                    |                                                                                                                                                                                                                                                                                                                                                                                                                                                                                                                                                                                                                                                                                                                    |

**Table S2. Predicted siRNA molecules with target, GC%, T<sub>m</sub>C<sub>p</sub>, T<sub>m</sub> (concentration) (point at which concentration increases), and validity (binary).**

| <b>Location of target within mRNA</b> | <b>siRNA target within mRNA</b> | <b>Predicted siRNA duplex siRNA candidate at 37° C</b> | <b>GC %</b> | <b>T<sub>m</sub>C<sub>p</sub></b> | <b>T<sub>m</sub>(conc)</b> | <b>Validity (binary)</b> |
|---------------------------------------|---------------------------------|--------------------------------------------------------|-------------|-----------------------------------|----------------------------|--------------------------|
| 175-197                               | GGCGTTTTGCCTCAACTTGAACA         | UUCAAGUUGAGGCAAAACGCC<br>CGUUUUGCCUCAACUUGAACA         | 47.62       | 85.2                              | 84.7                       | 1.004                    |
| 365-387                               | TTCTTCGTAAGAACGGTAATAAA         | UAUUACCGUUCUUACGAAGAA<br>CUUCGUAAGAACGGUAAUAAA         | 33.33       | 81.9                              | 81.3                       | 0.978                    |
| 645-667                               | GTCCGAACAACCTGGACTTTATTG        | AUAAAGUCCAGUUGUUCGGAC<br>CCGAACAACUGGACUUUAUUG         | 42.86       | 84.8                              | 83.7                       | 0.916                    |
| 958-980                               | CTCATGAAGTGTGATCATTGTGG         | ACAAUGAUCACACUUCAUGAG<br>CAUGAAGUGUGAUCAUUGUGG         | 38.1        | 79.6                              | 78.8                       | 0.937                    |
| 1060-1082                             | GCCACTACTTGTGGTTACTTACC         | UAAGUAACCACAAGUAGUGGC<br>CACUACUUGUGGUUACUACC          | 42.86       | 84.9                              | 84                         | 0.927                    |
| 1080-1102                             | ACCCCAAAATGCTGTTGTTAAAA         | UUAACAACAGCAUUUUGGGGU<br>CCCAAAAUGCUGUUGUAAAA          | 38.1        | 84                                | 82.7                       | 1.044                    |
| 1409-1431                             | ATGAAGAGATCGCCATTATTTTG         | AAAUAAUGGCGAUCUCUUCAU<br>GAAGAGAUCGCCAUUAUUUUG         | 33.33       | 82.8                              | 81.5                       | 0.913                    |

|           |                         |                                                 |       |      |      |       |
|-----------|-------------------------|-------------------------------------------------|-------|------|------|-------|
| 1467-1489 | AACTGTGAAAGGTTTGGATTATA | UAAUCCAAACCUUUCACAGUU<br>CUGUGAAAGGUUUGGAUUUAUA | 33.33 | 82.2 | 80.9 | 0.989 |
| 1505-1527 | TTGTTGAATCCTGTGGTAATTTT | AAUUACCACAGGAUUCAACAA<br>GUUGAAUCCUGUGGUAUUUUU  | 33.33 | 82.1 | 80.8 | 0.955 |
| 1761-1783 | ATCTGATTTGGCTACTAACAATC | UUGUUAGUAGCCAAAUCAGAU<br>CUGAUUUGGCUACUAACAAUC  | 33.33 | 82.2 | 80.9 | 0.977 |
| 1784-1806 | TAGTTGTAATGGCCTACATTACA | UAAUGUAGGCCAUUACAACUA<br>GUUGUAAUGGCCUACAUAACA  | 33.33 | 83.8 | 82.8 | 0.918 |
| 1843-1865 | AACATCTTTGGCACTGTTTATGA | AUAAACAGUGCCAAAGAUGUU<br>CAUCUUUGGCACUGUUUAUGA  | 33.33 | 82.8 | 81.4 | 0.960 |
| 2349-2371 | TTGTATTAACGGGCTTATGTTGC | AACAUAAGCCCGUUAUAACAA<br>GUAUUAACGGGCUUAUGUUGC  | 33.33 | 82.5 | 81.6 | 0.982 |
| 2358-2380 | CGGGCTTATGTTGCTCGAAATCA | AUUUCGAGCAACAUAAGCCCG<br>GGCUUAUGUUGCUCGAAAUCA  | 47.62 | 87.3 | 85.9 | 0.991 |
| 2697-2719 | GTGGAGTATGGCTACATACTACT | UAGUAUGUAGCCAUACUCCAC<br>GGAGUAUGGCUACAUAACUACU | 42.86 | 85.7 | 84.7 | 1.064 |
| 2805-2827 | TTGTGAAGAAGAAGAGTTTGAGC | UCAAACUCUUCUUCUUCACAA<br>GUGAAGAAGAAGAGUUUGAGC  | 33.33 | 79.7 | 78.6 | 0.913 |
| 2920-2942 | GAGCAAGAAGAAGATTGGTTAGA | UAACCAAUCUUCUUCUUGCUC                           | 38.1  | 82.5 | 81.2 | 0.968 |

|           |                          |                                                 |       |      |      |       |
|-----------|--------------------------|-------------------------------------------------|-------|------|------|-------|
|           |                          | GCAAGAAGAAGAUUGGUUAGA                           |       |      |      |       |
| 2984-3006 | AGGACAATCAGACAACTACTATT  | UAGUAGUUGUCUGAUUGUCCU<br>GACAAUCAGACAACUACUAUU  | 38.1  | 82.8 | 81.6 | 0.900 |
| 3051-3073 | ACCAGTTGTTTCAGACTATTGAAG | UCAAUAGUCUGAACAAACUGGU<br>CAGUUGUUCAGACUAUUGAAG | 38.1  | 81.4 | 80.7 | 1.008 |
| 3136-3158 | GTGGAAGAAGCTAAAAAGGTAAA  | UACCUUUUUAGCUUCUCCAC<br>GGAAGAAGCUAAAAAGGUAAA   | 38.1  | 83   | 81.6 | 1.062 |
| 3318-3340 | CGGACACAATCTTGCTAAACACT  | UGUUUAGCAAGAUUGUGUCCG<br>GACACAAUCUUGCUGAAACACU | 42.86 | 83.1 | 81.9 | 1.072 |
| 3425-3447 | AAGTTCTACTTGCACCATTATTA  | AUAAUGGUGCAAGUAGAACUU<br>GUUCUACUUGCACCAUUAUUA  | 33.33 | 83.5 | 82.1 | 0.951 |
| 3580-3602 | AAGAGTGAAAAGCAAGTTGAACA  | UUCAACUUGCUIIUCACUCUU<br>GAGUGAAAAGCAAGUUGAACA  | 33.33 | 81.3 | 80   | 1.030 |
| 3735-3757 | AACTAAGTTCCTCACAGAAAACCT | UUUUCUGUGAGGAACUUAGUU<br>CUAAGUCCUCACAGAAAACU   | 33.33 | 81.9 | 81.5 | 0.968 |
| 3804-3826 | CACTCTTGTTAGTGACATTGACA  | UCAAUGUCACUAACAAGAGUG<br>CUCUUGUUAGUGACAUUGACA  | 38.1  | 80.2 | 79.7 | 0.892 |
| 3869-3891 | TTGTTCAAGAGGGTGTTTTAACT  | UUAAAACACCCUCUUGAACAA<br>GUUCAAGAGGGUGUUUUAACU  | 33.33 | 82.5 | 81.3 | 1.031 |
| 4022-4044 | AGGCAAAGACAGTGCTTAAAAAG  | UUUUAAGCACUGUCUUUGCCU                           | 38.1  | 84.8 | 83.5 | 0.977 |

|           |                         |                                                 |       |      |      |       |
|-----------|-------------------------|-------------------------------------------------|-------|------|------|-------|
|           |                         | GCAAAGACAGUGCUUAAAAAG                           |       |      |      |       |
| 4284-4306 | AACAACGTAGCGTCACTTATCA  | AUAAGUGACGCUACAGUUGUU<br>CAACUGUAGCGUCACUUAUCA  | 38.1  | 85.5 | 84.2 | 0.947 |
| 4479-4501 | TTCTAAAACACCTGAAGAACATT | UGUUCUUCAGGUGUUUUAGAA<br>CUAAAACACCUGAAGAACAUU  | 33.33 | 80.7 | 79.4 | 1.017 |
| 4932-4954 | TAGGTACATGTCAGCATTAAATC | UUUAAUGCUGACAUGUACCUA<br>GGUACAUGUCAGCAUUAUAUC  | 33.33 | 83.2 | 81.8 | 1.079 |
| 4965-4987 | GTGGAAATACCCACAAGTTAATG | UUAACUUGUGGGUAAUUUCCAC<br>GGAAAUACCCACAAGUUAUUG | 38.1  | 82.6 | 81.9 | 1.029 |
| 5229-5251 | TTGCAAAAGAGTCTTGAACGTGG | ACGUUCAAGACUCUUUUGCAA<br>GCAAAAGAGUCUUGAACGUGG  | 38.1  | 82.1 | 81   | 0.978 |
| 5289-5311 | GGGTGTAGAAGCTGTTATGTACA | UACAUACAGCUUCUACACCC<br>GUGUAGAAGCUGUUAUGUACA   | 42.86 | 84.3 | 83.1 | 0.990 |
| 5538-5560 | TTGCATAGACGGTGCTTTACTTA | AGUAAAAGCACCGUCUAUGCAA<br>GCAUAGACGGUGCUUUACUUA | 42.86 | 86.6 | 85.5 | 0.930 |
| 5539-5561 | TGCATAGACGGTGCTTTACTTAC | AAGUAAAAGCACCGUCUAUGCA<br>CAUAGACGGUGCUUUACUUA  | 42.86 | 86.5 | 85.4 | 0.995 |
| 5745-5767 | ACCAAACCAACCATATCCAAACG | UUUGGAUAUGGUUGGUUUGGU<br>CAAACCAACCAUAUCCAAACG  | 38.1  | 83   | 81.7 | 0.945 |
| 6043-6065 | AGCACAAAACCAGTTGAAACATC | UGUUUCAACUGGUUUUGUGCU                           | 38.1  | 81.9 | 80.6 | 0.957 |

|           |                          |                                                 |       |      |      |       |
|-----------|--------------------------|-------------------------------------------------|-------|------|------|-------|
|           |                          | CACAAAACCAGUUGAAACAUC                           |       |      |      |       |
| 6146-6168 | AAGAAGTAGTGGAAAATCCTACC  | UAGGAUUUCCACUACUUCUU<br>GAAGUAGUGGAAAUCCUACC    | 33.33 | 82.1 | 81   | 0.941 |
| 6206-6228 | CCGAAGTTGTAGGAGACATTATA  | UAAUGUCUCCUACAACUUCGG<br>GAAGUUGUAGGAGACAUUAUA  | 42.86 | 84.5 | 83.3 | 0.925 |
| 6374-6396 | ATGGTTTAGCTGCTGTTAATAGT  | UAUUAACAGCAGCUAAACCAU<br>GGUUUAGCUGCUGUUAUAGU   | 33.33 | 84.4 | 83   | 0.997 |
| 6838-6860 | ACCTACTGTACTGGTTCTATACC  | UAUAGAACCAGUACAGUAGGU<br>CUACUGUACUGGUUCUAUACC  | 38.1  | 85   | 83.7 | 0.906 |
| 6857-6879 | TACCTTG TAGTGTTTGTCTTAGT | UAAGACAAACACUACAAGGUA<br>CCUUGUAGUGUUUGUCUUAGU  | 33.33 | 82.5 | 81.1 | 0.951 |
| 7196-7218 | ATGTTGTAGACGGTTGTAATTCA  | AAUUACAACCGUCUACAACAU<br>GUUGUAGACGGUUGUAAUUCA  | 33.33 | 82.5 | 81.2 | 0.968 |
| 7250-7272 | GAGCAACAAGAGTCGAATGTACA  | UACAUUCGACUCUUGUUGCUC<br>GCAACAAGAGUCGAAUGUACA  | 42.86 | 84   | 82.7 | 0.934 |
| 7284-7306 | TGGTGTTAGAAGGTCCTTTTATG  | UAAAAGGACCUUCUAACACCA<br>GUGUUAGAAGGUCCUUUUAUG  | 38.1  | 84.7 | 83.4 | 0.949 |
| 7332-7354 | TTGCAAAC TACACAATTGGAATT | UUCCAAUUGUGUAGUUUGCAA<br>GCAAACUACACA AUUGGAAUU | 33.33 | 80.9 | 79.7 | 0.941 |
| 7514-7536 | TTGATAAAGCTGGTCAAAAGACT  | UCUUUUGACCAGCUUUAUCAA                           | 33.33 | 81.2 | 80   | 1.064 |

|           |                           |                                                |       |      |      |       |
|-----------|---------------------------|------------------------------------------------|-------|------|------|-------|
|           |                           | GAUAAAGCUGGUCAAAAGACU                          |       |      |      |       |
| 7542-7564 | AAGACATTCTCTCTCATTTTG     | AAAUGAGAGAGAGAAUGUCUU<br>GACAUUCUCUCUCUCAUUUUG | 33.33 | 81.7 | 80.5 | 0.926 |
| 7659-7681 | TGCAAAATCAGCGTCTGTTTACT   | UAAACAGACGCUGAUUUUGCA<br>CAAAAUCAGCGUCUGUUUACU | 38.1  | 83.7 | 82.5 | 0.966 |
| 7687-7709 | CAGCTTATGTGTCAACCTATACT   | UAUAGGUUGACACAUAAGCUG<br>GCUUAUGUGUCAACCUAUACU | 38.1  | 83.5 | 82.2 | 1.020 |
| 7808-7830 | ACGTACCAATGGAAAACTCAA     | UGAGUUUUUCCAUUGGUACGU<br>GUACCAAUGGAAAAACUCAAA | 38.1  | 81.6 | 80.4 | 0.944 |
| 7864-7886 | AAGAATGTGTCCTTAGACAATGT   | AUUGUCUAAGGACACAUUCUU<br>GAAUGUGUCCUUAGACAAUGU | 33.33 | 81.7 | 80.7 | 0.933 |
| 7971-7993 | GTCACATCAATCTGACATAGAAG   | UCUAUGUCAGAUUGAUGUGAC<br>CACAUCAAUCUGACAUAGAAG | 38.1  | 79.3 | 78.9 | 0.975 |
| 8155-8177 | ATGTCATTGTCTGAACAACACTACG | UAGUUGUUCAGACAAUGACAU<br>GUCAUUGUCUGAACAACUACG | 33.33 | 80.6 | 79.7 | 0.985 |
| 8163-8185 | GTCTGAACAACACTACGAAAACAAA | UGUUUUCGUAGUUGUUCAGAC<br>CUGAACAACUACGAAAACAAA | 38.1  | 80.3 | 79.1 | 0.982 |
| 8273-8295 | TAGCACTTAAGGGTGGTAAAATT   | UUUUACCACCCUUAAGUGCUA<br>GCACUUAAGGGUGGUAAAAUU | 38.1  | 86.9 | 85.5 | 0.960 |
| 8373-8395 | ACCTGTTCATGTCATGTCTAAAC   | UUAGACAUGACAUGAACAGGU                          | 38.1  | 82.3 | 81   | 0.855 |

|           |                          |                                                 |       |      |      |       |
|-----------|--------------------------|-------------------------------------------------|-------|------|------|-------|
|           |                          | CUGUUCAUGUCAUGUCUAAAC                           |       |      |      |       |
| 8459-8481 | TAGCATCTACAGATACTTGTTTT  | AACAAGUAUCUGUAGAUGCUA<br>GCAUCUACAGAUACUUGUUUU  | 33.33 | 82.2 | 81.2 | 0.923 |
| 8542-8564 | GACAAAGCTTGCCCATTGATTGC  | AAUCA AUGGGCAAGCUUUGUC<br>CAAAGCUUGCCCAUUGAUUGC | 42.86 | 85.6 | 84.3 | 0.846 |
| 8613-8635 | CACGATATTACGCACA ACTAATG | UUAGUUGUGCGUAAUAUCGUG<br>CGAUUUACGCACAACUAAUG   | 38.1  | 82.2 | 81   | 1.065 |
| 8683-8705 | ATCTGTTACACACCATCAAACT   | UUUUGAUGGUGUGUAACAGAU<br>CUGUUACACACCAUCAAAACU  | 33.33 | 81.4 | 80.3 | 0.935 |
| 8723-8745 | TTGCAACATCAGCTTGTTGTTTTG | AAACACAAGCUGAUGUUGCAA<br>GCAACAUCAGCUUGUGUUUUG  | 38.1  | 84.2 | 83   | 0.908 |
| 8902-8924 | TACCTTGAAGGTTCTGTTAGAGT  | UCU AACAGAACCUUCAAGGUA<br>CCUUGAAGGUUCUGUUAGAGU | 38.1  | 83.3 | 83.1 | 0.917 |
| 8981-9003 | CTGGTGTTTGTGTATCTACTAGT  | UAGUAGAUACACAAACACCAG<br>GGUGUUUGUGUAUCUACUAGU  | 38.1  | 82.6 | 81.2 | 1.001 |
| 9002-9024 | GTGGTAGATGGGTACTTAACAAT  | UGUUAAGUACCCAUCUACCAC<br>GGUAGAUGGGUACUUAACAAU  | 42.86 | 84.7 | 83.4 | 1.024 |
| 9121-9143 | TTGGACATATCAGCATCTATAGT  | UAUAGAUGCUGAU AUGUCCAA<br>GGACAUAUCAGCAUCUAUAGU | 33.33 | 82.3 | 81   | 0.998 |
| 9708-9730 | GGCTCTCAATGACTTCAGTAACT  | UUACUGAAGUCAUUGAGAGCC                           | 42.86 | 83.5 | 82.3 | 0.939 |



|             |                          |                                                  |       |      |      |       |
|-------------|--------------------------|--------------------------------------------------|-------|------|------|-------|
|             |                          | CUCUCA AUGACUUCAGUAACU                           |       |      |      |       |
| 9712-9734   | CTCAATGACTTCAGTAACTCAGG  | UGAGUUACUGAAGUCAUUGAG<br>CAAUGACUUCAGUAACUCAGG   | 38.1  | 80.8 | 79.6 | 0.940 |
| 9779-9801   | CTGTTTTGCAGAGTGGTTTTAGA  | UAAAACCACUCUGCAAAACAG<br>GUUUUGCAGAGUGGUUUUAGA   | 38.1  | 83.5 | 82.2 | 0.990 |
| 9830-9852   | AGGGTTGTATGGTACAAGTAACT  | UUACUUGUACCAUACAACCCU<br>GGUUGUAUGGUACAAGUAACU   | 38.1  | 84   | 82.8 | 0.997 |
| 10073-10095 | ATCCTAAGACACCTAAGTATAAG  | UAUACUUAGGUGUCUUAGGAU<br>CCUAAGACACCUAAGUAUAAG   | 33.33 | 83.7 | 82.4 | 0.983 |
| 10172-10194 | GTGCTATGAGGCCCAATTTCACT  | UGAAAUUGGGCCUCAUAGCAC<br>GCUAUGAGGCCCAAUUCACU    | 47.62 | 87.4 | 86.1 | 0.877 |
| 10408-10430 | TGGTTGTACGCTGCTGTTATAAA  | UAUAACAGCAGCGUACAACCA<br>GUUGUACGCUGCUGUUAUAAA   | 42.86 | 87.6 | 86.3 | 0.912 |
| 10451-10473 | ATCGATTTACCACA ACTCTTAAT | UAAGAGUUGUGGUA AAUCGAU<br>CGAUUUACCACAACUCUUA AU | 33.33 | 81.6 | 80.3 | 1.004 |
| 10557-10579 | AACTGGAATTGCCGTTTTAGATA  | UCUAAAACGGCAAU UCCAGUU<br>CUGGAAUUGCCGUUUUAGAU A | 38.1  | 83.1 | 83.1 | 0.949 |
| 10702-10724 | TTCCAAAGTGCAGTGAAAAGAAC  | UCUUUUCACUGCACUUUGGAA<br>CCAAAGUGCAGUGAAAAGAAC   | 38.1  | 82.8 | 81.5 | 0.998 |
| 10999-11021 | TTGGATATGGTTGATACTAGTTT  | ACUAGUAUCAACCAUAUCCAA                            | 33.33 | 80.9 | 79.7 | 0.970 |

|             |                          |                                                |       |      |      |       |
|-------------|--------------------------|------------------------------------------------|-------|------|------|-------|
|             |                          | GGUAUAGGUUGAUACUAGUUU                          |       |      |      |       |
| 11088-11110 | AGCAAGAAGCTGTGTATGATGATG | UCAUCAUACACAGUUCUUGCU<br>CAAGAACUGUGUAUGAUGAUG | 38.1  | 81.5 | 80.4 | 0.979 |
| 11499-11521 | TAGCATAGATGCCTTCAAACCTCA | AGUUUGAAGGCAUCUAUGC<br>GCAUAGAUGCCUUCAAACUCA   | 38.1  | 84.2 | 83   | 0.919 |
| 11664-11686 | GGCTCAATGTGTCCAGTTACACA  | UGUAACUGGACACAUUGAGCC<br>CUCAAUGUGUCCAGUUACACA | 47.62 | 84.9 | 83.8 | 1.003 |
| 11674-11696 | GTCCAGTTACACAATGACATTCT  | AAUGUCAUUGUGUAACUGGAC<br>CCAGUUACACAAUGACAUUCU | 38.1  | 81.4 | 80.2 | 0.922 |
| 11709-11731 | TACTACTGAAGCCTTTGAAAAAA  | UUUUCAAAGGCUUCAGUAGUA<br>CUACUGAAGCCUUUGAAAAAA | 33.33 | 83.1 | 82   | 0.950 |
| 11825-11847 | AAGCTATAGCCTCAGAGTTTAGT  | UAAACUCUGAGGCUAUAGCUU<br>GCUAUAGCCUCAGAGUUUAGU | 38.1  | 87.2 | 85.8 | 0.974 |
| 12020-12042 | AAGCTATGACCCAAATGTATAAA  | UAUACAUUUGGGUCAUAGCUU<br>GCUAUGACCCAAAUGUAUAAA | 33.33 | 83.3 | 81.9 | 0.961 |
| 12298-12320 | CAGGTTGTAGATGCAGATAGTAA  | ACUAUCUGCAUCUACAACCUG<br>GGUUGUAGAUGCAGAUAGUAA | 42.86 | 84.3 | 83   | 0.889 |
| 12396-12418 | GGCCAATTCTGCTGTCAAATTAC  | AAUUUGACAGCAGAAUUGGCC<br>CCAAUUCUGCUGUCAAAUAC  | 42.86 | 84.3 | 83   | 1.047 |
| 12546-12568 | TGCACTGTTATCCGATTTACAGG  | UGUAAAUCGGAUAACAGUGCA                          | 38.1  | 82.3 | 81.1 | 0.941 |

|             |                          |                                                  |       |      |      |       |
|-------------|--------------------------|--------------------------------------------------|-------|------|------|-------|
|             |                          | CACUGUUAUCCGAUUUACAGG                            |       |      |      |       |
| 12555-12577 | ATCCGATTTACAGGATTTGAAAT  | UUCAAAUCCUGUAAAUCGGAU<br>CCGAUUUACAGGAUUUGAAAU   | 33.33 | 80.4 | 79.6 | 1.048 |
| 12825-12847 | TGCTGCTAAAGCTTACAAAGATT  | UCUUUGUAAGCUUUAGCAGCA<br>CUGC UAAAGCUUACAAAGAUU  | 38.1  | 83.8 | 83.3 | 0.999 |
| 12994-13016 | TGCCACATAGATCATCCAAATCC  | AUUUGGAUGAUCUAUGUGGCA<br>CCACAUAGAUAUCCAAAUCC    | 38.1  | 83.1 | 81.9 | 0.985 |
| 13056-13078 | ACCTACA ACTTGTGCTAATGACC | UCAUUAGCACAAGUUGUAGGU<br>CUACAACUUGUGC UAAUGACC  | 38.1  | 82.6 | 81.7 | 0.996 |
| 13404-13426 | TTCTCTAACTACCAACATGAAGA  | UUCAUGUUGGUAGUUAGAGAA<br>CUCUAACUACCAACAUGAAGA   | 33.33 | 81.2 | 79.9 | 1.018 |
| 14443-14465 | CTGTGTCTAAGGGTTTCTTTAAG  | UAAAGAAACCCUUAGACACAG<br>GUGUCUAAGGGUUUCUUUAAG   | 38.1  | 83.8 | 82.4 | 0.959 |
| 14554-14576 | TACCAACAATGTGTGATATCAGA  | UGAUAUCACACAUUGUUGGUA<br>CCAACA AUGUGUGAU AUCAGA | 33.33 | 79.9 | 79   | 0.963 |
| 14749-14771 | ATGCACTTTTCGCATATACAAAA  | UUGUAUAUGCGAAAAGUGCAU<br>GCACUUUCGCAU AUACAAAA   | 33.33 | 80.5 | 81.5 | 1.003 |
| 14812-14834 | ATGCCATTAGTGCAAAGAATAGA  | UAUUCUUUGCACUAAUGGCAU<br>GCCAUUAGUGCAAAGAAUAGA   | 33.33 | 83.1 | 81.8 | 0.970 |
| 14851-14873 | GTGTCTCTATCTGTAGTACTATG  | UAGUACUACAGAUAGAGACAC                            | 38.1  | 82.8 | 81.5 | 1.007 |

|             |                         |                                                |       |      |      |       |
|-------------|-------------------------|------------------------------------------------|-------|------|------|-------|
|             |                         | GUCUCUAUCUGUAGUACUAUG                          |       |      |      |       |
| 14864-14886 | TAGTACTATGACCAATAGACAGT | UGUCUAUUGGUCAUAGUACUA<br>GUACUAUGACCAAUAGACAGU | 33.33 | 81.3 | 80.3 | 0.969 |
| 14873-14895 | GACCAATAGACAGTTTCATCAAA | UGAUGAAACUGUCUAUUGGUC<br>CCAAUAGACAGUUUCAUAAA  | 38.1  | 80.6 | 79.4 | 0.960 |
| 15590-15612 | TACTAAAGGACCTCATGAATTTT | AAUUCAUGAGGUCCUUUAGUA<br>CUAAAGGACCUCAUGAAUUUU | 33.33 | 82.8 | 81.5 | 0.985 |
| 15798-15820 | CAGGAGTATGCTGATGTCTTTCA | AAAGACAUCAGCAUACUCCUG<br>GGAGUAUGCUGAUGUCUUUCA | 42.86 | 85.1 | 83.7 | 0.976 |
| 15843-15865 | AAGCTACATGATGAGTTAACAGG | UGUUAACUCAUCAUGUAGCUU<br>GCUACAUGAUGAGUUAACAGG | 33.33 | 81.1 | 79.9 | 1.015 |
| 15855-15877 | GAGTTAACAGGACACATGTTAGA | UAACAUGUGUCCUGUUAACUC<br>GUUAACAGGACACAUGUUAGA | 38.1  | 82.2 | 81.1 | 0.951 |
| 15992-16014 | TTGCAATTCACAGACTTCATTAA | AAUGAAGUCUGUGAAUUGCAA<br>GCAAUUCACAGACUUCAUUA  | 33.33 | 81.1 | 79.9 | 0.949 |
| 16026-16048 | TGCATACGTAGACCATTCTTATG | UAAGAAUGGUCUACGUAUGCA<br>CAUACGUAGACCAUUCUUAUG | 38.1  | 83.3 | 82.7 | 0.930 |
| 16056-16078 | TGCTGTTACGACCATGTCATATC | UAUGACAUGGUCGUAACAGCA<br>CUGUUACGACCAUGUCAUAUC | 42.86 | 85.2 | 84.6 | 1.018 |
| 16336-16358 | TAGCTAACACCTGTACTGAAAGA | UUUCAGUACAGGUGUUAGCUA                          | 38.1  | 85.5 | 84.1 | 0.923 |

|             |                         |                                                |       |      |      |       |
|-------------|-------------------------|------------------------------------------------|-------|------|------|-------|
|             |                         | GCUAACACCUGUACUGAAAGA                          |       |      |      |       |
| 16349-16371 | TACTGAAAGACTCAAGCTTTTTG | AAAAGCUUGAGUCUUUCAGUA<br>CUGAAAGACUCAAGCUUUUUG | 33.33 | 82.8 | 81.7 | 0.918 |
| 16517-16539 | TACTGGTTATCGTGTAATAAAA  | UUAGUUACACGAUAACCAGUA<br>CUGGUUAUCGUGUAACUAAAA | 33.33 | 82.4 | 81.4 | 0.987 |
| 16777-16799 | ATCAAAAGGTTGGTATGCAAAAG | UUUGCAUACCAACCUUUUGAU<br>CAAAAGGUUGGUAUGCAAAAG | 33.33 | 82.2 | 80.9 | 0.923 |
| 17367-17389 | GACAAATCAGCTCAATGCTTTAA | AAAGCAUUGAGCUGAUUUUGUC<br>CAAUCAGCUCAAUGCUUUAA | 38.1  | 82.4 | 81.3 | 0.942 |
| 17486-17508 | TTGGAGAAAAGCTGTCTTTATTT | AUAAAGACAGCUUUUCUCCAA<br>GGAGAAAAGCUGUCUUUAUUU | 33.33 | 82.7 | 81.7 | 0.955 |
| 17607-17629 | TTCACTCAAACCACTGAAACAGC | UGUUUCAGUGGUUUGAGUGAA<br>CACUCAAACACUGAAACAGC  | 38.1  | 82.2 | 81   | 0.948 |
| 17660-17682 | TGCTATTACCAGAGCAAAAGTAG | ACUUUUGCUCUGGUAAUAGCA<br>CUAUUACCAGAGCAAAAGUAG | 38.1  | 83.5 | 82.7 | 0.985 |
| 17671-17693 | GAGCAAAAGTAGGCATACTTTGC | AAAGUAUGCCUACUUUUGCUC<br>GCAAAGUAGGCAUACUUUGC  | 38.1  | 83.9 | 82.8 | 0.934 |
| 17690-17712 | TTGCATAATGTCTGATAGAGACC | UCUCUAUCAGACAUUAUGCAA<br>GCAUAAUGUCUGAUAGAGACC | 33.33 | 80.2 | 79.3 | 1.049 |
| 17697-17719 | ATGTCTGATAGAGACCTTTATGA | AUAAAGGUCUCUAUCAGACAU                          | 33.33 | 82.6 | 81.6 | 0.930 |

|             |                         |                                                 |       |      |      |       |
|-------------|-------------------------|-------------------------------------------------|-------|------|------|-------|
|             |                         | GUCUGAUAGAGACCUUUAUGA                           |       |      |      |       |
| 17699-17721 | GTCTGATAGAGACCTTTATGACA | UCAUAAAGGUCUCUAUCAGAC<br>CUGAUAGAGACCUUUAUGACA  | 38.1  | 81   | 80.1 | 0.953 |
| 17753-17775 | TAGGAATGTGGCAACTTTACAAG | UGUAAAAGUUGCCACAUUCCUA<br>GGAAUGUGGCAACUUUACAAG | 38.1  | 84.1 | 82.9 | 0.954 |
| 18000-18022 | CGCGAAGAAGCTATAAGACATGT | AUGUCUUAUAGCUUCUUCGCG<br>CGAAGAAGCUAUAAGACAUGU  | 42.86 | 84.5 | 83.2 | 0.979 |
| 18248-18270 | TTGGAATGTAGTGCGTATAAAGA | UUUAUACGCACUACAUUCCAA<br>GGAAUGUAGUGCGUAUAAAGA  | 33.33 | 82.7 | 81.5 | 0.986 |
| 18338-18360 | TGGCTTTGAGTTGACATCTATGA | AUAGAUGUCAACUCAAGCCA<br>GCUUUGAGUUGACAUCUAUGA   | 38.1  | 83.3 | 82.1 | 1.037 |
| 19234-19256 | ATGCTAATGAGTACAGATTGTAT | ACAAUCUGUACUCAUAGCAU<br>GCUAAUGAGUACAGAUUGUAU   | 33.33 | 80.9 | 80   | 0.940 |
| 19584-19606 | GTGGACATTGCTGCTAATACTGT | AGUAUUAGCAGCAAUGUCCAC<br>GGACAUUGCUGCUAAUACUGU  | 42.86 | 84.3 | 83.4 | 0.949 |
| 19680-19702 | AAGAAACCAACTGAAACGATTTG | AAUCGUUUCAGUUGGUUUCUU<br>GAAACCAACUGAAACGAUUUG  | 33.33 | 81.2 | 80   | 1.011 |
| 19764-19786 | GCCCGTAATGGTGTTCTTATTAC | AAUAAGAACACCAUACGGGC<br>CCGUAAUGGUGUUCUUAUAC    | 42.86 | 84.8 | 83.7 | 0.963 |
| 19823-19845 | TCCCAAACAAGCTAGTCTTAATG | UUAAGACUAGCUUGUUUGGGA                           | 38.1  | 84.4 | 83.2 | 0.965 |

|             |                         |                                                |       |      |      |       |
|-------------|-------------------------|------------------------------------------------|-------|------|------|-------|
|             |                         | CCAAACAAGCUAGUCUAAAUG                          |       |      |      |       |
| 19911-19933 | GTCCAACAATTACCTGAAACTTA | AGUUUCAGGUAAUUGUUGGAC<br>CCAACAAUUACCUGAAACUUA | 38.1  | 80.5 | 79.4 | 0.953 |
| 20045-20067 | TGCCTTCGAACATATCGTTTATG | UAAACGAUAUGUUCGAAGGCA<br>CCUUCGAACAUUCGUUUAUG  | 38.1  | 83.2 | 82.2 | 0.968 |
| 20049-20071 | TTCGAACATATCGTTTATGGAGA | UCCAUAACGAUAUGUUCGAA<br>CGAACAUUCGUUUAUGGAGA   | 33.33 | 78.3 | 78.2 | 1.016 |
| 20915-20937 | TTCTTGGAATGCTGATCTTTATA | UAAAGAUCAGCAUCCAAGAA<br>CUUGGAAUGCUGAUCUUUAUA  | 33.33 | 82   | 80.8 | 0.920 |

**Table S3. T<sub>m</sub> values of siRNA (guide strand and passenger strand).**

| RNA oligo sequences<br>21nt guide (5'→3')<br>21nt passenger (5'→3') | Seed-duplex stability (T <sub>m</sub> )°C |           |
|---------------------------------------------------------------------|-------------------------------------------|-----------|
|                                                                     | Guide                                     | Passenger |
| UUCAAGUUGAGGCAAAACGCC<br>CGUUUUGCCUCAACUUGAACA                      | 19.2 °C                                   | 21.1 °C   |
| UAUUACCGUUCUACGAAGAA<br>CUUCGUAAGAACGGUAAUAAA                       | 20.6 °C                                   | 16.5 °C   |
| AUAAAGUCCAGUUGUUCGGAC<br>CCGAACAACUGGACUUUAUUG                      | 14.6 °C                                   | 21.1 °C   |
| ACAAUGAUCACACUUCAUGAG<br>CAUGAAGUGUGAUCAUUGUGG                      | 13.6 °C                                   | 19.2 °C   |
| UAAGUAACCACAAGUAGUGGC<br>CACUACUUGUGGUUACUACC                       | 12.9 °C                                   | 17.6 °C   |
| UUAACAACAGCAUUUUGGGGU<br>CCCAAAAUGCUGUUGUAAAA                       | 14.7 °C                                   | 11.3 °C   |
| AAAUAAUGGGCGAUCUCUUCAU<br>GAAGAGAUCGCCAUUAUUUUG                     | -1.8 °C                                   | 19.1 °C   |
| UAAUCCAAACCUUUCACAGUU<br>CUGUGAAAGGUUUGGAUUAUA                      | 20.1 °C                                   | 20.5 °C   |
| AAUUACCACAGGAUUCAACAA<br>GUUGAAUCCUGUGGUAAUUUU                      | 20.0 °C                                   | 16.3 °C   |
| UUGUUAGUAGCCAAAUCAGAU<br>CUGAUUUGGCUACUAACAAUC                      | 19.0 °C                                   | 13.8 °C   |
| UAAUGUAGGCCAUUACAACUA<br>GUUGUAAUGGCCUACAUUACA                      | 11.6 °C                                   | 6.9 °C    |
| AUAAACAGUGCCAAAGAUGUU<br>CAUCUUUGGCACUGUUUAUGA                      | 11.8 °C                                   | 12.0 °C   |
| AACAUAAAGCCCGUAAUACAA<br>GUAUUAACGGGCUUAUGUUGC                      | 11.6 °C                                   | 1.4 °C    |
| AUUUCGAGCAACAUAAAGCCCG<br>GGCUUAUGUUGCUCGAAAUCA                     | 21.0 °C                                   | 19.7 °C   |
| UAGUAUGUAGCCAUACUCCAC<br>GGAGUAUGGCUACAUACUACU                      | 19.0 °C                                   | 20.3 °C   |
| UCAAACUCUUCUUCUUCACAA<br>GUGAAGAAGAAGAGUUUGAGC                      | 19.2 °C                                   | 20.4 °C   |
| UAACCAAUCUUCUUCUUGCUC<br>GCAAGAAGAAGAUUGGUUAGA                      | 18.8 °C                                   | 16.6 °C   |
| UAGUAGUUGUCUGAUUGUCCU<br>GACAAUCAGACAACUACUAAU                      | 17.6 °C                                   | 20.5 °C   |
| UCAAUAGUCUGAACAACUGGU<br>CAGUUGUUCAGACUAUUGAAG                      | 11.6 °C                                   | 17.8 °C   |



|                                                 |         |         |
|-------------------------------------------------|---------|---------|
| UACCUUUUAGCUUCUCCAC<br>GGAAGAAGCUAAAAAGGUAAA    | 17.3 °C | 19.1 °C |
| UGUUUAGCAAGAUUGUGUCCG<br>GACACAAUCUUGC UAAACACU | 20.9 °C | 19.3 °C |
| AUAAUGGUGCAAGUAGAACU<br>GUUCUACUUGCACCAUUAUUA   | 20.0 °C | 18.9 °C |
| UUCAACUUGC UUUUCACUCU<br>GAGUGAAAAGCAAGUUGAACA  | 19.2 °C | 19.2 °C |
| UUUCUGUGAGGAACUAGUU<br>CUAAGUCCUCACAGAAAACU     | 19.2 °C | 14.6 °C |
| UCA AUGUCACUAACAAGAGUG<br>CUCUUGUUAGUGACAUUGACA | 20.5 °C | 19.2 °C |
| UUAAAACACCCUCUUGAACAA<br>GUUCAAGAGGGUGUUUUAACU  | 7.2 °C  | 20.4 °C |
| UUUUAAGCACUGUCUUUGCCU<br>GCAAAGACAGUGCUUAAAAAG  | 13.7 °C | 19.2 °C |
| AUAAGUGACGCUACAGUUGUU<br>CAACUGUAGCGUCACUUAUCA  | 20.3 °C | 19.0 °C |
| UGUUCUUCAGGUGUUUAGAA<br>CUAAAACACCGAAGAACA U    | 21.5 °C | 7.2 °C  |
| UUUAAUGCUGACAUGUACCUA<br>GGUACAUGUCAGCAUUA AUC  | 15.3 °C | 20.4 °C |
| UUAACUUGUGGGUAUUUCCAC<br>GGAAAUACCCACAAGUUA AUG | 11.8 °C | 10.0 °C |
| ACGUUCAAGACUCUUUUGCAA<br>GCAAAGAGUCUUGAACGUGG   | 21.1 °C | 12.2 °C |
| UACAU AACAGCUUCUACACCC<br>GUGUAGAAGCUGUUAUGUACA | 14.6 °C | 20.3 °C |
| AGUAAAGCACCGUCUAUGCAA<br>GCAUAGACGGUGCUUUACUUA  | 20.9 °C | 20.3 °C |
| AAGUAAAGCACCGUCUAUGCA<br>CAUAGACGGUGCUUUACUUA   | 9.8 °C  | 20.9 °C |
| UUUGGAUAUGGUUGGUUUGGU<br>CAAACCAACCAUAUCCAAACG  | 21.2 °C | 18.8 °C |
| UGUUUCAACUGGUUUUGUGCU<br>CACAAAACCAGUUGAAACAUC  | 14.9 °C | 13.3 °C |
| UAGGAUUUCCACUACUUCU<br>GAAGUAGUGGAAAUCCUACC     | 18.7 °C | 17.6 °C |
| UAAUGUCUCCUACAACUUCGG<br>GAAGUUGUAGGAGACAUUAUA  | 19.2 °C | 17.8 °C |
| UAUUAACAGCAGCUAAACCAU<br>GGUUUAGCUGCUGUUAUAGU   | 6.9 °C  | 20.9 °C |
| UAUAGAACCAGUACAGUAGGU<br>CUACUGUACUGGUUCUAUACC  | 14.5 °C | 20.2 °C |

|                                                 |         |         |
|-------------------------------------------------|---------|---------|
| UAAGACAAACACUACAAGGUA<br>CCUUGUAGUGUUUGUCUUAGU  | 19.2 °C | 16.4 °C |
| AAUUACAACCGUCUACAACAU<br>GUUGUAGACGGUUGUAAUUCA  | 6.9 °C  | 20.3 °C |
| UACAUUCGACUCUUGUUGCUC<br>GCAACAAGAGUCGAAUGUACA  | 21.1 °C | 16.7 °C |
| UAAAAGGACCUUCUAACACCA<br>GUGUUAGAAGGUCCUUUAUG   | 18.7 °C | 20.3 °C |
| UCCAAUUGUGUAGUUUGCAA<br>GCAAACUACACAAUUGGAAUU   | 20.1 °C | 11.8 °C |
| UCUUUUGACCAGCUUUAUCAA<br>GAUAAAGCUGGUCAAAAGACU  | 12.2 °C | 13.6 °C |
| AAAUGAGAGAGAGAAUGUCUU<br>GACAUUCUCUCUCAUUUUG    | 20.4 °C | 19.2 °C |
| UAAACAGACGCUGAUUUUGCA<br>CAAAAUCAGCGUCUGUUUACU  | 19.2 °C | 7.4 °C  |
| UAUAGGUUGACACAU AAGCUG<br>GCUUAUGUGUCAACCUAUACU | 18.5 °C | 11.6 °C |
| UGAGUUUUCCA UUGGUACGU<br>GUACCAAUGGAAAACUCAA    | 13.3 °C | 20.0 °C |
| AUUGUCUAAGGACACAUUCUU<br>GAAUGUGUCCUAGACAAUGU   | 20.3 °C | 19.3 °C |
| UCUAUGUCAGAUUGAUGUGAC<br>CACAUCAAUCUGACAUAGAAG  | 20.3 °C | 20.5 °C |
| UAGUUGUUCAGACAAUGACAU<br>GUCAUUGUCUGAACAACUACG  | 17.8 °C | 20.5 °C |
| UGUUUUCGUAGUUGUUCAGAC<br>CUGAACAACUACGAAAACAAA  | 15.3 °C | 20.5 °C |
| UUUUACCACCCUUAAGUGCUA<br>GCACUUAAGGGUGGUAAAAUU  | 20.0 °C | 11.8 °C |
| UUAGACAUGACAUGAACAGGU<br>CUGUUCAUGUCAUGUCUAAAC  | 20.3 °C | 20.5 °C |
| AACAAGUAUCUGUAGAUGCUA<br>GCAUCUACAGAUACUUGUUUU  | 19.0 °C | 20.3 °C |
| AAUCA AUGGGCAAGCUUUGUC<br>CAAAGCUUGCCCAUUGAUUGC | 13.6 °C | 17.0 °C |
| UUAGUUGUGCGUAAUAUCGUG<br>CGAUAAUACGCACAACUAAUG  | 19.0 °C | 3.5 °C  |
| UUUUGAUGGUGUGUAACAGAU<br>CUGUACACACCAUCAAAAACU  | 13.8 °C | 20.4 °C |
| AAACACAAGCUGAUGUUGCAA<br>GCAACAUCAGCUUGUGUUUUG  | 19.3 °C | 20.5 °C |
| UCUAACAGAACCUUCAAGGUA<br>CCUUGAAGGUUCUGUUAGAGU  | 16.4 °C | 16.6 °C |

|                                                 |         |         |
|-------------------------------------------------|---------|---------|
| UAGUAGAUACACAAACACCAG<br>GGUGUUUGUGUAUCUACUAGU  | 18.9 °C | 19.3 °C |
| UGUUAAGUACCCAUCUACCAC<br>GGUAGAUGGGUACUUAACAAU  | 12.9 °C | 20.3 °C |
| UAUAGAUGCUGAUUUGUCCAA<br>GGACAUAUACAGCAUCUAUAGU | 13.3 °C | 16.0 °C |
| UUACUGAAGUCAUUGAGAGCC<br>CUCUCAAUGACUUCAGUAACU  | 20.3 °C | 20.4 °C |
| UGAGUUACUGAAGUCAUUGAG<br>CAAUGACUUCAGUAACUCAGG  | 21.4 °C | 19.2 °C |
| UAAAACCACUCUGCAAAACAG<br>GUUUUGCAGAGUGGUUUUAGA  | 18.8 °C | 20.0 °C |
| UUACUUGUACCAUACAACCCU<br>GGUUGUAUGGUACAAGUAACU  | 19.0 °C | 14.6 °C |
| UAUACUUAGGUGUCUUAGGAU<br>CCUAAGACACCUAAGUAUAAG  | 6.3 °C  | 18.9 °C |
| UGAAAUUGGGCCUCAUAGCAC<br>GCUAUGAGGCCCAAUUUCACU  | 7.4 °C  | 17.8 °C |
| UAUAACAGCAGCGUACAACCA<br>GUUGUACGCUGCUGUUAUAAA  | 11.6 °C | 21.0 °C |
| UAAGAGUUGUGGUAAAUCGAU<br>CGAUUUACCACAACUCUUAUU  | 17.7 °C | 10.0 °C |
| UCUAAAACGGCAAUUCAGUU<br>CUGGAAUUGCCGUUUUAGUAU   | 4.9 °C  | 20.1 °C |
| UCUUUUCACUGCACUUUGGAA<br>CCAAAGUGCAGUGAAAAGAAC  | 12.2 °C | 16.7 °C |
| ACUAGUAUCAACCAUAUCCAA<br>GGAUUUGGUUGAUACUAGUUU  | 11.2 °C | 21.2 °C |
| UCAUCAUACACAGUUCUUGCU<br>CAAGAACUGUGUAUGAUGAUG  | 14.9 °C | 17.7 °C |
| AGUUUGAAGGCAUCUAUGCUA<br>GCAUAGAUGCCUCAAACUCA   | 14.9 °C | 13.3 °C |
| UGUAACUGGACACAUUGAGCC<br>CUCAAUGUGUCCAGUUACACA  | 19.0 °C | 20.5 °C |
| AAUGUCAUUGUGUAAACUGGAC<br>CCAGUUACACAAUGACAUUCU | 20.5 °C | 19.0 °C |
| UUUCAAAGGCUUCAGUAGUA<br>CUACUGAAGCCUUUGAAAAAA   | 7.7 °C  | 20.3 °C |
| UAAACUCUGAGGCUAUAGCUU<br>GCUAUAGCCUCAGAGUUUAGU  | 17.7 °C | 19.5 °C |
| UAUACAUUUGGGUCAUAGCUU<br>GCUAUGACCCAAAUGUAUAAA  | 6.7 °C  | 20.3 °C |
| ACUAUCUGCAUCUACAACCUG<br>GGUUGUAGAUGCAGAUAGUAA  | 17.8 °C | 19.0 °C |

|                                                 |         |         |
|-------------------------------------------------|---------|---------|
| AAUUUGACAGCAGAAUUGGCC<br>CCAAUUCUGCUGUCAAUUAC   | 14.8 °C | 12.0 °C |
| UGUAAAUCGGUAACAGUGCA<br>CACUGUUAUCCGAUUUACAGG   | 10.0 °C | 19.0 °C |
| UUCAAAUCCUGUAAAUCGGAU<br>CCGAUUUACAGGAUUUGAAAU  | 16.3 °C | 9.0 °C  |
| UCUUUGUAAGCUUUAGCAGCA<br>CUGCUBAAAGCUUACAAAGAUU | 11.8 °C | 19.7 °C |
| AUUUGGAUGAUCUAUGUGGCA<br>CCACAUAGAUCAUCCAAAUCC  | 20.1 °C | 17.9 °C |
| UCAUUAGCACAAGUUGUAGGU<br>CUACAACUUGUGCUAAUGACC  | 19.7 °C | 19.0 °C |
| UUCAUGUUGGUAGUUAGAGAA<br>CUCUAACUACCAACAUGAAGA  | 20.5 °C | 18.9 °C |
| UAAAGAAACCCUUAGACACAG<br>GUGUCUAAGGGUUUCUUUAAG  | 5.5 °C  | 20.3 °C |
| UGAUUAUCACACAUUGUUGGUA<br>CCAACAAUGUGUGAUUACAGA | 17.4 °C | 12.1 °C |
| UUGUAUAUGCGAAAAGUGCAU<br>GCACUUUUCGCAUUAUACAAA  | 8.2 °C  | 10.3 °C |
| UAUUCUUUGCACUAAUGGCAU<br>GCCAUUAGUGCAAAGAAUAGA  | 5.3 °C  | 17.4 °C |
| UAGUACUACAGAUAGAGACAC<br>GUCUCUAUCUGUAGUACUAUG  | 18.8 °C | 20.2 °C |
| UGUCUAUUGGUCAUAGUACUA<br>GUACUAUGACCAAUAGACAGU  | 14.5 °C | 13.1 °C |
| UGAUGAAACUGUCUAUUGGUC<br>CCAUAUAGACAGUUUCAUAAA  | 16.3 °C | 13.4 °C |
| AAUUCAUGAGGUCCUUUAGUA<br>CUAAAGGACCUCAUGAAUUUU  | 13.6 °C | 19.9 °C |
| AAAGACAUCAGCAUACUCCUG<br>GGAGUAUGCUGAUGUCUUUCA  | 19.2 °C | 20.3 °C |
| UGUUAACUCAUCAUGUAGCUU<br>GCUACAUGAUGAGUUAAACAGG | 12.9 °C | 17.9 °C |
| UAACAUGUGUCCUGUUAACUC<br>GUUAACAGGACACAUGUUAGA  | 19.3 °C | 11.8 °C |
| AAUGAAGUCUGUGAAUUGCAA<br>GCAAUUCACAGACUUCAUUA   | 19.2 °C | 13.8 °C |
| UAAGAAUGGUCUACGUAUGCA<br>CAUACGUAGACCAUUCUUAUG  | 12.0 °C | 16.2 °C |
| UAUGACAUGGUCGUAACAGCA<br>CUGUUACGACCAUGUCAUAUC  | 20.5 °C | 21.0 °C |
| UUUCAGUACAGGUGUUAGCUA<br>GCUAACACCUGUACUGAAAGA  | 20.3 °C | 19.0 °C |

|                                                 |         |         |
|-------------------------------------------------|---------|---------|
| AAAAGCUUGAGUCUUUCAGUA<br>CUGAAAGACUCAAGCUUUUUG  | 17.0 °C | 20.4 °C |
| UUAGUUACACGAUAACCAGUA<br>CUGGUUAUCGUGUAACUAAAA  | 14.3 °C | 20.0 °C |
| UUUGCAUACCAACCUUUUGAU<br>CAAAAGGUUGGUAUGCAAAAAG | 21.1 °C | 17.3 °C |
| AAAGCAUUGAGCUGAUUUGUC<br>CAAUCAGCUCAAUGCUUUAA   | 18.5 °C | 12.0 °C |
| AUAAAGACAGCUUUUCUCCAA<br>GGAGAAAAGCUGUCUUUAUUU  | 14.6 °C | 14.8 °C |
| UGUUUCAGUGGUUUGAGUGAA<br>CACUCAAAACCACUGAAACAGC | 19.2 °C | 19.2 °C |
| ACUUUUGCUCUGGUAUAGCA<br>CUAUUACCAGAGCAAAGUAG    | 18.6 °C | 15.3 °C |
| AAAGUAUGCCUACUUUUGCUC<br>GCAAAGUAGGCAUACUUUGC   | 11.6 °C | 10.3 °C |
| UCUCUAUCAGACAUUAUGCAA<br>GCAUAAUGUCUGAUAGAGACC  | 20.2 °C | 5.6 °C  |
| AUAAAGGUCUCUAUCAGACAU<br>GUCUGAUAGAGACCUUUUAUGA | 18.6 °C | 21.4 °C |
| UCAUAAAGGUCUCUAUCAGAC<br>CUGAUAGAGACCUUUUAUGACA | 3.5 °C  | 21.4 °C |
| UGUAAAGUUGCCACAUCCUA<br>GGAAUGUGGCAACUUACAAG    | 12.9 °C | 20.5 °C |
| AUGUCUUAUAGCUUCUUCGCG<br>CGAAGAAGCUAUAAGACAUGU  | 20.3 °C | 19.1 °C |
| UUUAUACGCACUACAUUCCAA<br>GGAAUGUAGUGCGUAUAAAGA  | 8.5 °C  | 16.1 °C |
| AUAGAUGUCAACUCAAGCCA<br>GCUUUGAGUUGACAUCUAUGA   | 20.3 °C | 16.6 °C |
| ACAAUCUGUACUCAUUAGCAU<br>GCUAAUGAGUACAGAUUGUAU  | 18.1 °C | 13.4 °C |
| AGUAUUAGCAGCAAUGUCCAC<br>GGACAUUGCUGCUAAUACUGU  | 6.3 °C  | 20.5 °C |
| AAUCGUUUCAGUUGGUUUCUU<br>GAAACCAACUGAAACGAUUUG  | 15.2 °C | 18.8 °C |
| AAUAAGAACACCAUUACGGGC<br>CCGUAAUGGUGUUCUUAUUAC  | 6.9 °C  | 13.7 °C |
| UUAAGACUAGCUUGUUUGGGA<br>CCAAACAAGCUAGUCUUAUUG  | 18.9 °C | 12.2 °C |
| AGUUUCAGGUAAUUGUUGGAC<br>CCAACA AUUACCUGAAACUUA | 19.2 °C | 12.1 °C |
| UAAACGAUAUGUUCGAAGGCA<br>CCUUCGAACAUAUCGUUUUAUG | 15.2 °C | 21.0 °C |

|                                               |         |         |
|-----------------------------------------------|---------|---------|
| UCCAUAACGAUAUGUUCGAA<br>CGAACAUUCGUUUAUGGAGA  | 12.8 °C | 16.1 °C |
| UAAAGAUCAGCAUCCAAGAA<br>CUUGGAAUGCUGAUCUUUAUA | 14.8 °C | 20.1 °C |
